# Supplementary material
Source: publisher site journal article supplement (https://www.dovepress.com/article/347110)
Supplement: Supplementary file 1 [file get_supplementary_file.php]

**Supplementary material**

**Supplementary Table S1.** **Host range analysis of bacteriophage IME268 against 84 strains**

| **Species** | **strains** | **Susceptibility** |
| --- | --- | --- |
| 899 | Klebsiella pneumoniae | - |
| 902 | Klebsiella pneumoniae | - |
| 919 | Klebsiella pneumoniae | + |
| 922 | Klebsiella pneumoniae | - |
| 930 | Klebsiella pneumoniae | - |
| 932 | Klebsiella pneumoniae | - |
| 938 | Klebsiella pneumoniae | + |
| 943 | Klebsiella pneumoniae | - |
| 948 | Klebsiella pneumoniae | - |
| 954 | Klebsiella pneumoniae | - |
| 955 | Klebsiella pneumoniae | - |
| 960 | Klebsiella pneumoniae | + |
| 970 | Klebsiella pneumoniae | - |
| 972 | Klebsiella pneumoniae | + |
| 973 | Klebsiella pneumoniae | - |
| 982 | Klebsiella pneumoniae | - |
| 995 | Klebsiella pneumoniae | - |
| 1000 | Klebsiella pneumoniae | - |
| 1011 | Klebsiella pneumoniae | - |
| 1020 | Klebsiella pneumoniae | + |
| 1023 | Klebsiella pneumoniae | - |
| 1024 | Klebsiella pneumoniae | - |
| 1029 | Klebsiella pneumoniae | - |
| 1052 | Klebsiella pneumoniae | - |
| 1053 | Klebsiella pneumoniae | - |
| 1073 | Klebsiella pneumoniae | - |
| 1079 | Klebsiella pneumoniae | - |
| 1080 | Klebsiella pneumoniae | - |
| 1082 | Klebsiella pneumoniae | - |
| 1090 | Klebsiella pneumoniae | + |
| 1096 | Klebsiella pneumoniae | + |
| 1098 | Klebsiella pneumoniae | - |
| 1100 | Klebsiella pneumoniae | - |
| 1117 | Klebsiella pneumoniae | - |
| 1118 | Klebsiella pneumoniae | - |
| 1119 | Klebsiella pneumoniae | - |
| 1127 | Klebsiella pneumoniae | - |
| 1129 | Klebsiella pneumoniae | - |
| 1132 | Klebsiella pneumoniae | - |
| 1146 | Klebsiella pneumoniae | - |
| 1150 | Klebsiella pneumoniae | - |
| 1151 | Klebsiella pneumoniae | - |
| 1155 | Klebsiella pneumoniae | + |
| 1165 | Klebsiella pneumoniae | - |
| 1171 | Klebsiella pneumoniae | + |
| 1181 | Klebsiella pneumoniae | - |
| 1183 | Klebsiella pneumoniae | - |
| 1185 | Klebsiella pneumoniae | - |
| 1189 | Klebsiella pneumoniae | - |
| 1215 | Klebsiella pneumoniae | - |
| 1216 | Klebsiella pneumoniae | - |
| 1222 | Klebsiella pneumoniae | - |
| 1238 | Klebsiella pneumoniae | - |
| 1241 | Klebsiella pneumoniae | - |
| 1254 | Klebsiella pneumoniae | + |
| 1286 | Klebsiella pneumoniae | - |
| 1291 | Klebsiella pneumoniae | - |
| 1299 | Klebsiella pneumoniae | - |
| 1300 | Klebsiella pneumoniae | - |
| 1301 | Klebsiella pneumoniae | - |
| 1733 | Klebsiella pneumoniae | + |
| 2781 | Klebsiella pneumoniae | + |
| 2782 | Klebsiella pneumoniae | + |
| 2783 | Klebsiella pneumoniae | - |
| 2784 | Klebsiella pneumoniae | + |
| 2785 | Klebsiella pneumoniae | - |
| 2786 | Klebsiella pneumoniae | + |
| 2787 | Klebsiella pneumoniae | - |
| 2788 | Klebsiella pneumoniae | - |
| 2789 | Klebsiella pneumoniae | - |
| 3041 | Klebsiella pneumoniae | - |
| 3042 | Klebsiella pneumoniae | + |
| 3043 | Klebsiella pneumoniae | + |
| 3044 | Klebsiella pneumoniae | + |
| 3045 | Klebsiella pneumoniae | + |
| 2018 | E.coli | - |
| 2019 | E.coli | - |
| 2020 | E.coli | - |
| 2021 | E.coli | - |
| 2022 | E.coli | - |
| 2023 | E.coli | - |
| 2024 | E.coli | - |
| 2025 | E.coli | - |
| 2026 | E.coli | - |
| 2027 | E.coli | - |

“**+**” lysis “**-**” no lysis
